# Supplementary material
Source: MDPI journal article supplement (https://www.mdpi.com/2071-1050/11/2/390)
Supplement: s1 [file s1]

# Supplementary Materials:

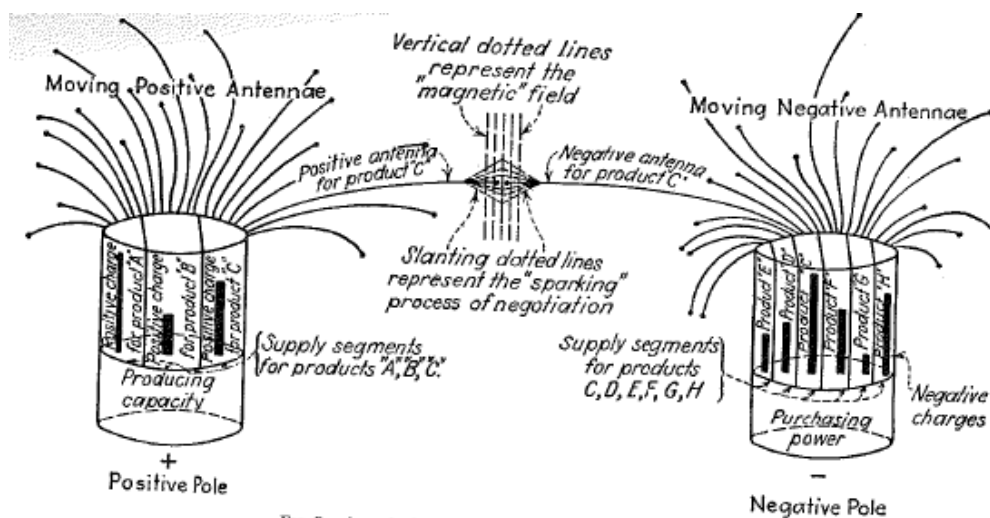

Source: Reproduced from Breyer [10] (p. 105)

Figure S1. A marketing circuit up to the point when it is closed

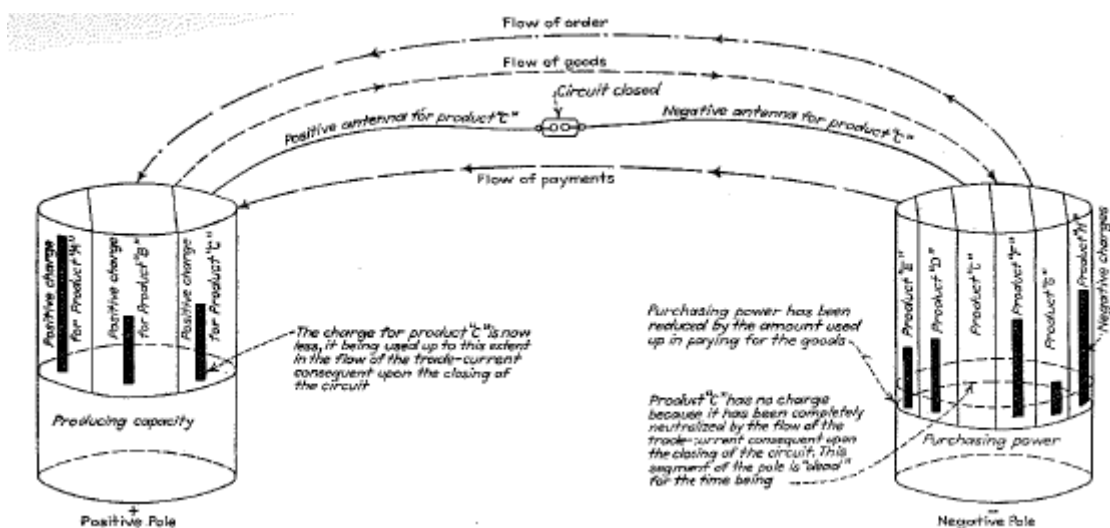

Source: Reproduced from Breyer (1934, p. 109)

Figure S2. A marketing circuit after it is closed.

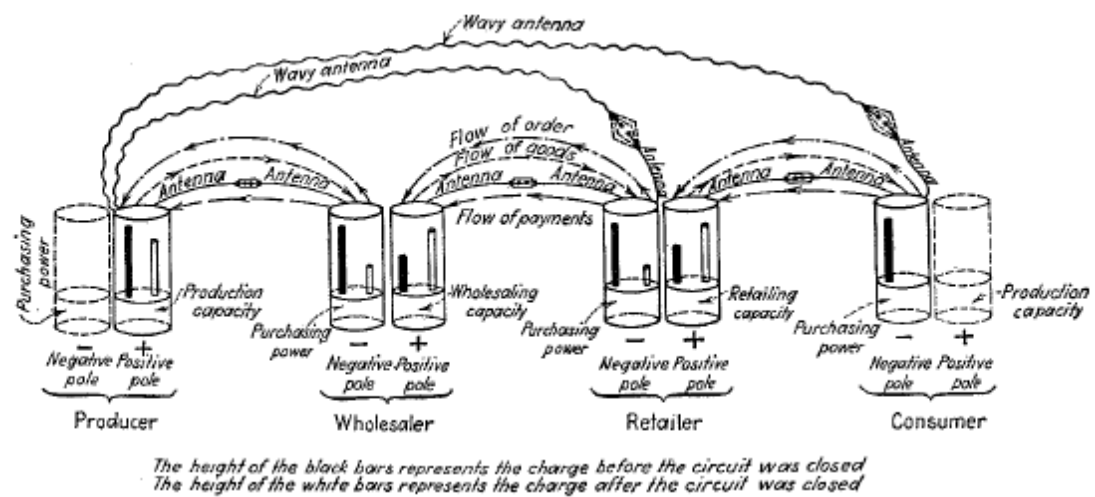

Source: reproduced from Breyer [10] (p. 110)

**Figure S3.** Marketing circuits for an indirect marketing system
